# Supplementary material for: Toward precision prescribing for methadone: Determinants of methadone deposition
Source: PLoS One. 2020 Apr 17;15(4):e0231467. doi: 10.1371/journal.pone.0231467 (PMC7164646; doi:10.1371/journal.pone.0231467)
Supplement: S3 File — This file contains an example of the data used in the SAS code. (CSV) [file pone.0231467.s003.csv]

subject	study_site	sex	exclusion_bmi_value	inclusion_hcv_hivhcv_none	ln_R_EDDP_Metha	ln_S_EDDP_Metha	race_2level	Genotype_3level	medication3
1	3	Male	27.89129141	Un	-2.342197642	-1.80921255	AA	Wild	no_medication
2	3	Male	25.72433853	HCV	-3.506557897	-3.686567314	AA	Lof	no_medication
3	3	Male	31.92690311	Un	-2.807714206	-2.143612965	AA	Lof	no_medication
4	2	Female	35.23613277	Un	-2.525281783	-2.067639317	AA	Lof	no_medication
5	3	Male	21.61575084	HCV	-2.647930389	-2.103399731	Other	Lof	no_medication
6	3	Female	30.17929293	Un	-2.633374875	-2.30353341	AA	Wild	no_medication
7	3	Male	19.78795271	Un	-2.092390516	-1.510224315	AA	Lof	no_medication
8	3	Female	38.6127488	Un	-2.797918191	-2.101420448	Other	Lof	no_medication
9	3	Male	30.55405405	HCV	-2.358264804	-2.1102132	AA	Wild	no_medication
10	3	Female	20.36911061	Un	-2.368622284	-2.201747642	AA	Lof	no_medication
11	3	Female	23.88521579	Un	-1.879042253	-1.580464758	AA	Wild	no_medication
12	3	Male	24.40972222	Un	-2.683063773	-2.782199047	Other	Lof	no_medication
13	3	Male	37.97067901	HCV	-3.026268997	-2.760091079	Other	Lof	no_medication
14	3	Male	29.97458517	HCV	-3.111201523	-2.780679976	AA	Wild	no_medication
15	3	Male	29.83410494	HCV	-2.954564232	-2.246383013	AA	Lof	no_medication
16	2	Female	29.37235996	Un	-2.777369817	-2.990382283	AA	Lof	no_medication
17	3	Male	26.14965398	HCV	-2.627064382	-2.088050335	AA	Lof	no_medication
18	2	Female	23.77471384	Un	-2.110301543	-1.78615175	Other	Lof	no_medication
19	3	Male	22.81163265	HCV	-2.760341749	-2.548903485	AA	Lof	no_medication
20	3	Female	37.9258494	HCV	-2.452715169	-1.810264529	AA	Lof	no_medication
21	3	Female	18.89277076	Un	-2.723185625	-2.465353457	Other	Wild	no_medication
22	3	Male	20.66891892	Un	-2.683701172	-2.552748824	Other	Wild	no_medication
23	3	Male	29.83410494	Un	-3.073458825	-2.526649879	AA	Wild	no_medication
24	2	Male	23.03465658	Co	-2.2924145	-1.708025629	Other	Lof	no_medication
25	2	Female	33.19722222	HCV	-3.222288797	-2.610867678	AA	Lof	no_medication
26	2	Female	32.48477211	Un	-2.713841587	-2.527115574	AA	Lof	no_medication
27	3	Female	35.54055556	Un	-2.483028562	-2.070387568	AA	Wild	no_medication
28	2	Female	36.04248047	Un	-2.405838126	-1.742851927	Other	Wild	no_medication
29	3	Male	21.79715976	Un	-2.236261155	-1.913973857	AA	Lof	no_medication
30	3	Female	26.85069444	HCV	-2.640271823	-2.105993261	AA	Lof	no_medication
31	2	Male	28.565427	Un	-2.443786063	-2.302795884	AA	Lof	no_medication
32	3	Female	26.6027832	Un	-3.143991131	-2.98706056	AA	Lof	no_medication
33	3	Male	25.0647401	HCV	-2.780226511	-2.397987189	AA	Wild	no_medication
34	2	Female	33.52427463	Un	-2.667962355	-2.309132952	AA	Gf	no_medication
35	3	Male	29.04958678	Co	-2.304087723	-2.212079679	AA	Lof	Inducer
36	2	Female	28.52808385	Un	-2.269235113	-1.898478285	AA	Lof	no_medication
37	4	Female	20.80306122	Co	-2.25644841	-2.051441226	AA	Lof	no_medication
38	4	Male	31.56326531	HCV	-2.489990343	-1.76485951	AA	Wild	no_medication
39	4	Female	29.85651974	HCV	-2.449369182	-2.248562363	AA	Wild	no_medication
40	4	Male	31.1330456	Un	-1.98665571	-1.685807133	AA	Lof	no_medication
41	4	Male	27.24515556	HCV	-2.250105614	-1.930173187	Other	Lof	no_medication
42	4	Male	23.85668945	HCV	-2.545792464	-2.457676272	AA	Lof	no_medication
43	4	Female	32.27976331	HCV	-1.457303108	-0.593009123	Other	Wild	no_medication
44	4	Male	20.79881657	Un	-2.842653164	-2.628398042	AA	Lof	no_medication
45	4	Male	21.74070069	HCV	-2.198087018	-1.710378232	Other	Gf	no_medication
46	4	Female	20.06183115	Un	-2.570648125	-2.166335624	Other	Lof	no_medication
47	5	Female	30.9862259	Un	-2.995732274	-2.805592069	AA	Lof	no_medication
48	5	Male	21.14167966	HCV	-1.814044846	-1.625996332	AA	Lof	no_medication
49	5	Male	20.63955564	HCV	-2.673784512	-2.414121191	AA	Lof	no_medication
50	5	Male	28.05503046	HCV	-2.201906077	-1.764281833	AA	Lof	no_medication
51	5	Male	21.01948302	HCV	-2.526291866	-2.157179408	AA	Wild	no_medication
52	5	Female	38.78857422	Un	-2.718176138	-2.321233652	AA	Lof	no_medication
53	5	Female	30.85388889	HCV	-1.649030397	-0.984528069	Other	Wild	Inducer
54	5	Female	39.86248852	Un	-2.345668679	-2.089574003	AA	Wild	no_medication
55	5	Male	25.93890101	Un	-2.535501645	-2.615947381	Other	Lof	no_medication
56	5	Male	32.07498512	Un	-3.172483354	-3.240883424	Other	Lof	no_medication
57	5	Female	35.42454019	Un	-2.602818726	-2.168281201	Other	Wild	no_medication
58	3	Male	30.34152749	Un	-3.421155279	-3.339476331	AA	Lof	no_medication
59	3	Male	22.59412305	Un	-1.957260345	-1.490572508	AA	Wild	no_medication
60	3	Male	24.95857988	Un	-2.433694825	-2.134679038	AA	Lof	no_medication
61	3	Female	20.17332415	Un	-2.265988983	-1.792189207	AA	Lof	no_medication
62	2	Male	23.67244898	Co	-2.933170875	-2.301915973	Other	Wild	no_medication
63	3	Male	23.56509516	Un	-2.58971877	-2.204396933	AA	Lof	no_medication
64	2	Male	30.40657439	Un	-3.882410452	-3.516759986	AA	Lof	no_medication
65	2	Male	29.04958678	HCV	-3.3249228	-3.045484815	AA	Lof	no_medication
66	2	Male	21.93540226	Co	-3.029633825	-2.404388315	AA	Wild	no_medication
67	3	Female	36.04248047	HCV	-2.467207073	-2.053446482	Other	Wild	no_medication
68	3	Female	25.82185491	HCV	-3.093904856	-2.979667671	Other	Lof	no_medication
69	3	Male	22.44402436	HCV	-1.610583716	-1.116344905	AA	Wild	no_medication
70	2	Male	21.55807603	HCV	-2.335515771	-2.141431651	AA	Lof	no_medication
71	3	Male	25.63020833	HCV	-3.0708301	-2.993359793	AA	Lof	no_medication
72	3	Male	19.13491124	Co	-2.727818141	-2.223815204	Other	Lof	no_medication
73	3	Female	23.17016602	Un	-2.360547484	-2.019992925	Other	Lof	no_medication
74	3	Male	19.99644444	Co	-2.631219657	-2.145731709	AA	Lof	Inducer
75	3	Male	23.01031541	HCV	-3.02954753	-2.521251025	Other	Lof	Inducer
76	2	Male	21.80734694	HCV	-2.649795897	-2.532159535	AA	Lof	no_medication
77	3	Female	25.42065557	Co	-2.666704916	-2.282883153	Other	Wild	Inducer
78	3	Male	21.47629439	HCV	-2.526594071	-1.828702985	Other	Lof	no_medication
79	3	Male	27.97653061	HCV	-2.355901845	-1.746765544	Other	Wild	no_medication
80	3	Male	23.7075977	Co	-2.50010587	-1.974043956	AA	Lof	no_medication
81	3	Female	22.04476644	Un	-2.274933561	-1.562154055	AA	Wild	no_medication
82	3	Male	25.38107518	HCV	-2.311668558	-1.846795875	Other	Wild	no_medication
83	2	Female	22.65289792	HCV	-2.262447765	-1.619065996	Other	Wild	no_medication
84	2	Female	23.3855102	HCV	-2.607161859	-2.150116499	Other	Gf	no_medication
85	2	Male	17.98988296	HCV	-3.535830876	-3.041676547	Other	Wild	no_medication
86	3	Male	17.15314422	Co	-2.503823809	-2.369665093	Other	Lof	no_medication
87	4	Male	22.70773001	HCV	-2.331606282	-1.790830533	Other	Lof	no_medication
88	8	Female	21.92470483	Co	-2.917406305	-2.435500532	Other	Lof	no_medication
89	8	Female	24.27378035	Co	-2.650807145	-2.27008895	Other	Lof	no_medication
90	8	Female	22.46272189	Co	-2.711541543	-2.221856279	Other	Wild	Inducer
91	6	Female	29.59835153	Co	-2.587283303	-1.949215097	AA	Wild	Inducer
92	6	Male	25.93890101	Co	-3.45374273	-2.98556644	AA	Lof	Inducer
93	6	Female	22.39451994	Co	-2.47776161	-2.18755985	Other	Wild	no_medication
94	6	Male	20.91846856	Co	-2.561484893	-1.995494127	AA	Lof	Inducer
95	6	Male	24.54533179	Co	-3.689004759	-3.486454812	AA	Wild	Inducer
96	5	Female	22.91689624	HCV	-2.118438548	-2.086157941	Other	Wild	no_medication
97	5	Female	22.86030177	Co	-2.020335083	-1.780189315	Other	Lof	no_medication
